# Supplementary material for: Thymidine Phosphorylase Is Increased in COVID-19 Patients in an Acuity-Dependent Manner
Source: PubMed Central journal article supplement (PMC8019714; doi:10.3389/fmed.2021.653773), 2021-03-22
Supplement: Presentation_1.pdf [file Presentation_1.pdf]

# Supplemental Figure I

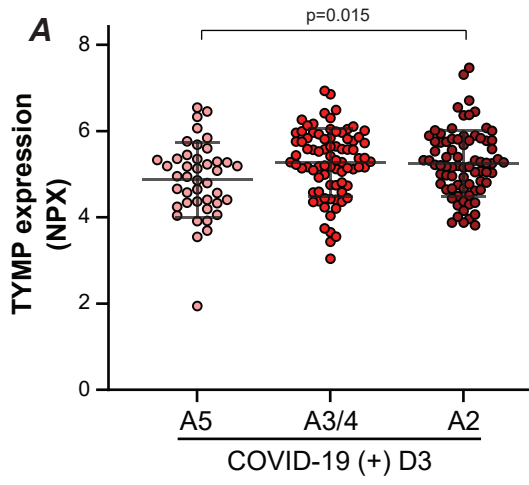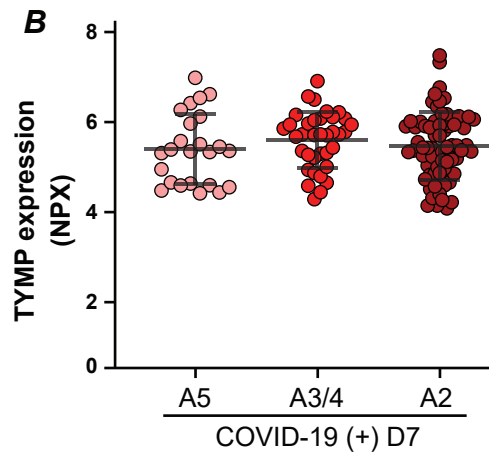

### Supplemental Figure II

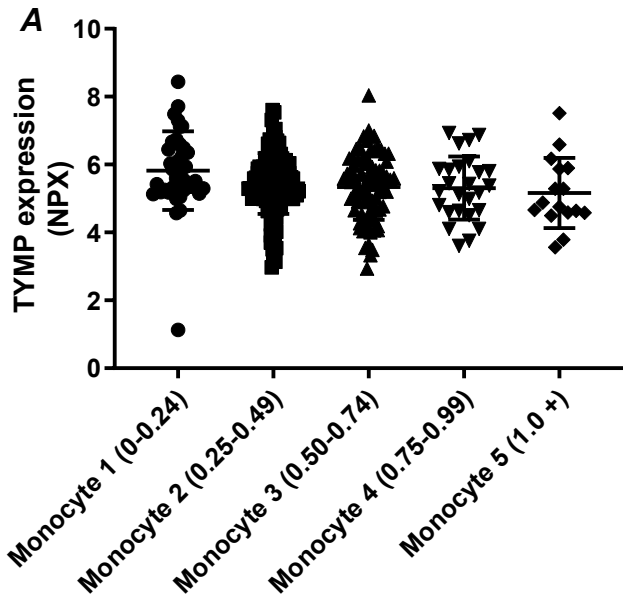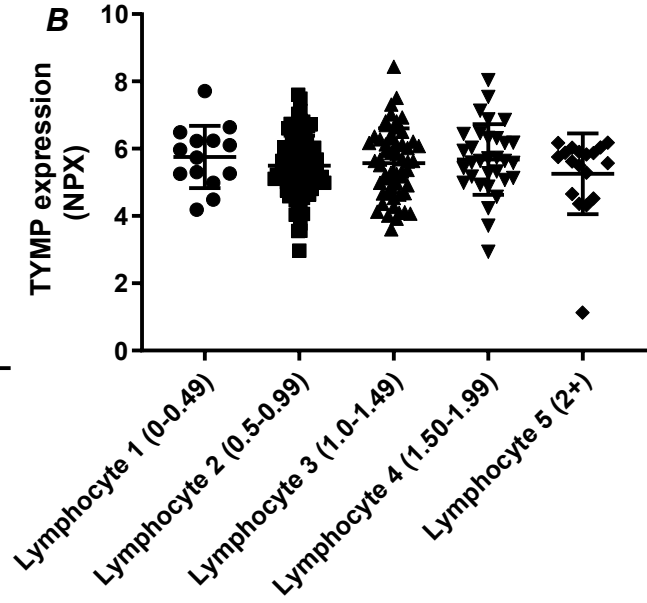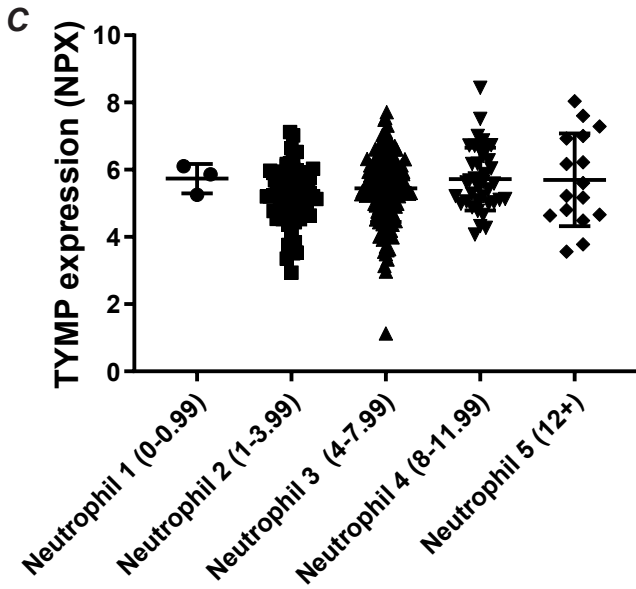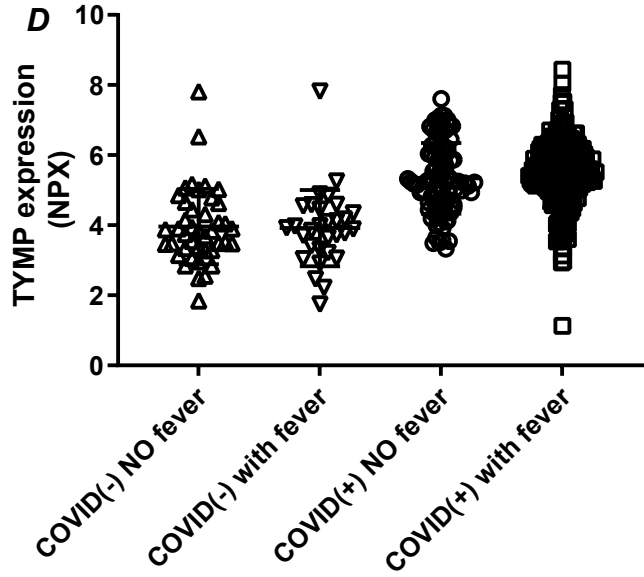

### Supplemental Figure III

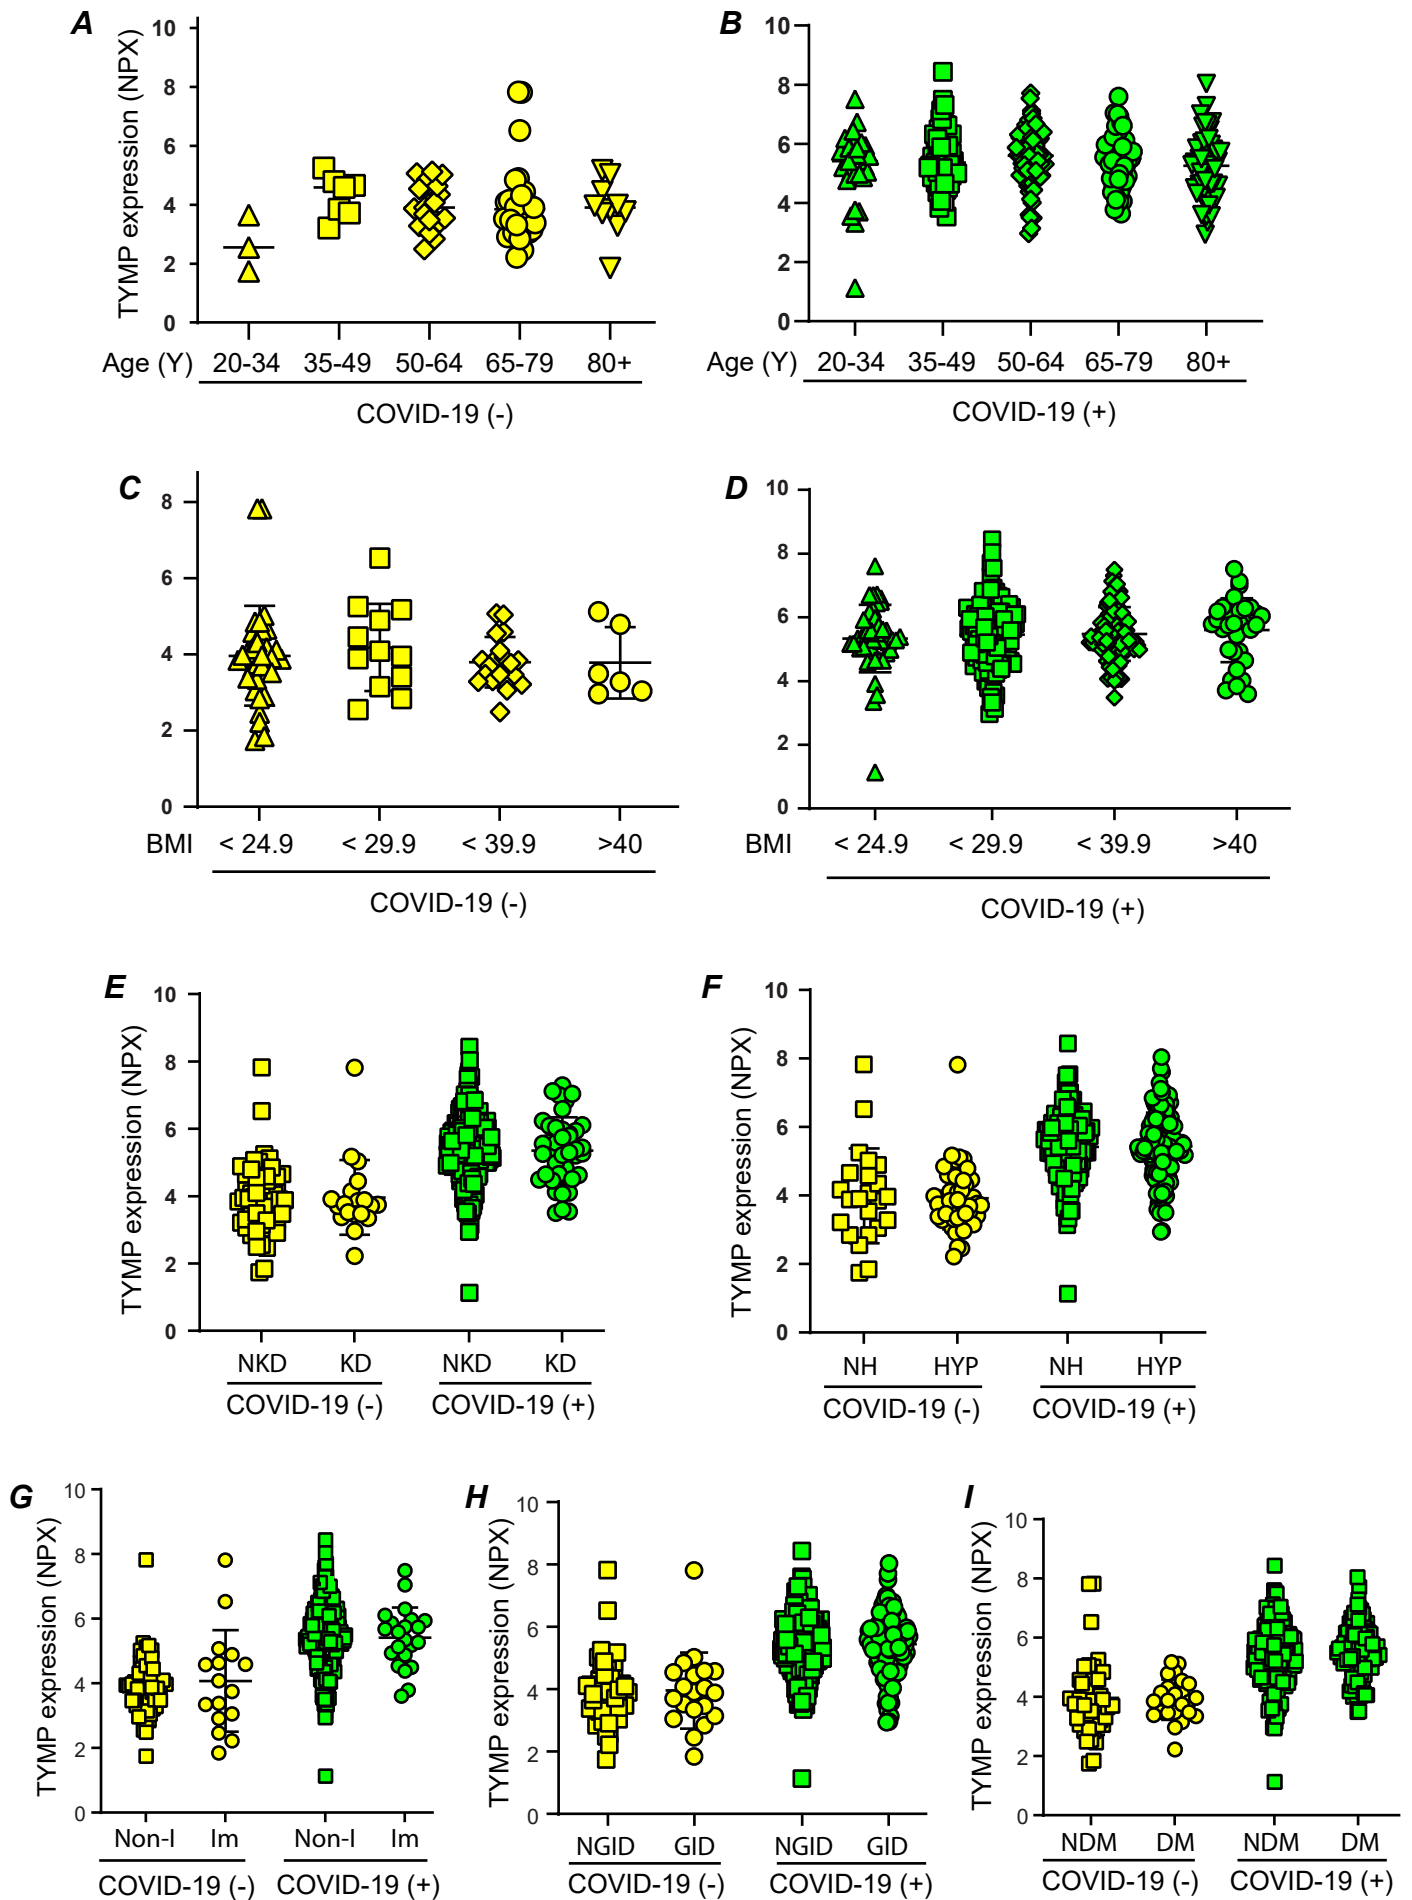

### Supplemental Figure IV

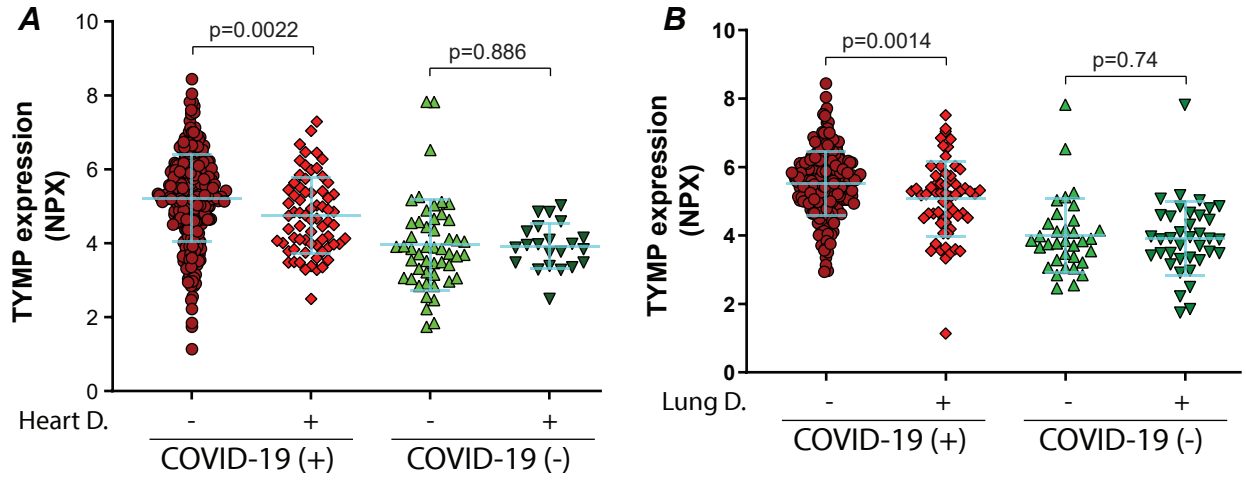

Supplemental Figure V

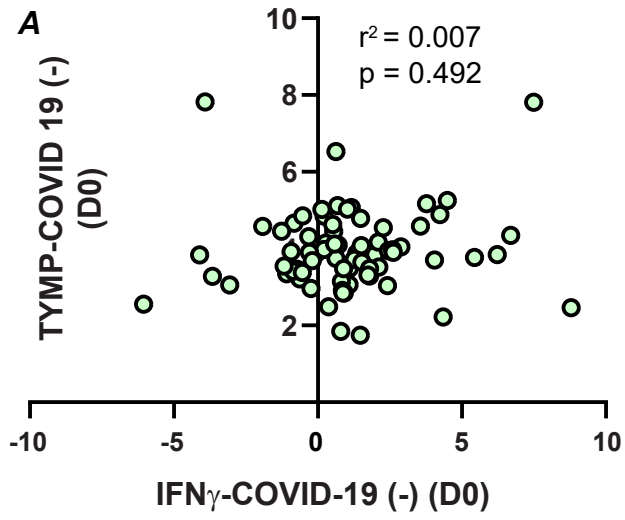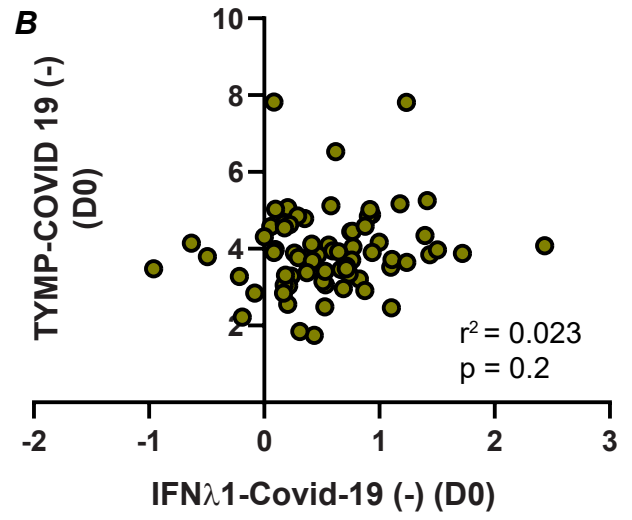

## Figure legends for supplemental figures

**Supplemental Figure I.** TYMP data were sorted based on the acuity on day 3 (**A**) and day 7 (**B**), and then TYMP expression was analyzed based on the defined groups. Acuity (A) 2 = Intubated, ventilated, survived to 28 days, A3 = Non-invasive ventilation or high-flow nasal cannula, A4 = Hospitalized, supplementary O<sub>2</sub> required, and A5 = Hospitalized, no supplementary O<sub>2</sub> required.

**Supplemental Figure II.** TYMP data were sorted based on cell counts (**A**, **B**, and **C**), fever (**D**), and then TYMP expression was analyzed.

**Supplemental Figure III.** TYMP data were sorted based on age (**A** and **B**), BMI (**C** and **D**), the presence or absence of kidney diseases (**E**), hypertension (**F**), pre-existing immunocompromised conditions (**G**), pre-existing gastrointestinal diseases (**H**), and diabetes mellites (**I**), and then TYMP expression was analyzed in both COVID-19 negative (yellow) and positive (green) patients. BMI = body mass index, NKD = no kidney diseases, KD = having some type of kidney diseases, NH = no hypertension, HYP = having hypertension, non-I = no pre-existing immunocompromised conditions, Im = having pre-existing immunocompromised conditions, NGID = no pre-existing gastrointestinal diseases, GID = having pre-existing gastrointestinal diseases, NDM = no diabetes mellites, and DM = having diabetes mellites.

**Supplemental Figure IV.** TYMP data were sorted based on the presence or absence of primary heart (**A**) and lung (**B**) diseases, and then TYMP expression was analyzed.

**Supplemental Figure V. Plasma TYMP level is not correlated with the expression of IFN- $\gamma$  or IFN- $\lambda$  in non-COVID-19 patients.** TYMP, IFN- $\gamma$ , and IFN- $\lambda$  data on day 0 were extracted and the correlation between TYMP plasma levels and IFN- $\gamma$  or IFN- $\lambda$  was analyzed, respectively.

| The table was generated based on supplemental data for Figure 2 of the following paper.                                                 |                                             |              |                  |
|-----------------------------------------------------------------------------------------------------------------------------------------|---------------------------------------------|--------------|------------------|
| Severe COVID-19 Is Marked by a Dysregulated Myeloid Cell Compartment, Cell, Volume 182, Issue 6, 17 September 2020, Pages 1419-1440.e23 |                                             |              |                  |
| <a href="https://doi.org/10.1016/j.cell.2020.08.001">https://doi.org/10.1016/j.cell.2020.08.001</a>                                     |                                             |              |                  |
| Cluster                                                                                                                                 | Monocyte description                        | LogFC        | Fold change (FC) |
| 0                                                                                                                                       | Classic monocytes                           | 0.92         | 8.3              |
| 1                                                                                                                                       | <b>HLA-DR<sup>hi</sup>CD83<sup>hi</sup></b> | <b>1.191</b> | <b>15.5</b>      |
| 2                                                                                                                                       | <b>CD163<sup>hi</sup></b>                   | <b>1.543</b> | <b>34.9</b>      |
| 3                                                                                                                                       | HLA-DR <sup>lo</sup> S100A <sup>hi</sup>    | 0.492        | 3.1              |
| 4                                                                                                                                       | non-classic                                 | 0.758        | 5.7              |
| 21                                                                                                                                      | mixed                                       | 0.304        | 2.0              |

Table 1. TYMP expression in peripheral-blood monocytes.
